# Supplementary material for: Identification of the master sex determining gene in Northern pike (Esox lucius) reveals restricted sex chromosome differentiation
Source: PLoS Genet. 2019 Aug 22;15(8):e1008013. doi: 10.1371/journal.pgen.1008013 (PMC6726246; doi:10.1371/journal.pgen.1008013)
Supplement: S3 Table — (XLSX) [file pgen.1008013.s013.xlsx]

## Sheet: Table S3
Table S3: Mapping of male specific sequences of E. lucius with RAD tag ID, sequence, mapping score from BWA and mapped linkage group and position on the reference genome assembly (GenBank assembly accession: GCA_000721915.3).
RAD tag ID	LG	Position	Mapping Quality	Sequence
1184	LG08	12863544	41	AGCCTCCTTAGCCTGTGCATTCCTGCACTACCAACCTCCTCTGCCCTCATCCGGACCACAACCTCCTCCAGCCTCTGCCTGAGCACCTCCTGCA
5188	LG24	22188065	60	TTTAGTGTGTAAGCAACTGGCAAAAACTGTAATGGTCAGAGATCCTGCGGTTCCAGATACCTGACTGGCAAACAGTGTGATGGATCCACCTGCA
6108	un placed scaffold0213	311242	26	TGCAGGCAGAACAGAGCTGAACATCACTGAAACAAAGAGGATTTATTCTTTGAAAGGAGCCAATGCTAAATAATTTACATTTAAATTCCACAAA
7894	un placed scaffold0213	217994	58	TGCAGGTTTAACCACATATGTTGCAAGTTATCATGTTTTCACTACAGGCCTTGACAGCAAAATAATCTCTCAAGAATAAGTTAATTTAAGTAAT
11743	LG24	1726883	28	CAAGGGAAGTCAAAGCAGCAAAGAAGATCTATGCTGAAAAACTGGAAAACAAATTCACAGCCAATGACCGCTCGTCGGTGTGGAAAGGCCTGCA
12976	un placed scaffold0213	323835	60	TGCAGGATGAAAAGTTGATGCGGGGCTAGTGAACTGGTGGAGAAGAAACGAGGACCGCTATCTACATTTTCTTTGACGGCCAATATTGCTGTTA
13441	un placed scaffold0213	323745	60	ATTTGAATGGCAAAATGCGCAACATAAATGCTTCATTGTCTGCCATTCTGTCTATGACCATCAATAAGAAAACACTGACTGCTGCTCACCTGCA
14619	un placed scaffold0213	482281	60	TGCAGGACATCATCAAGGCTGAGGAAGAAATAAATGCCTGTTAGGCAGCGTGATTCTGGAAAGCGTATATTGTCTGTTTAATTCCTTTAGGTTA
25769	un placed scaffold0213	482191	60	TTCCATTGAGCAAGGCCCCGCTCCACCACATGGGCTCTTGATACAGTGAGAGGAAATTCTTCCTCGTTGTTAACAGCAGCAGAGATGGCCTGCA
30707	LG24	22146752	60	TGCAGGCGCACCTGCGTGAAGTTTGCCCCCCCACCAACGCAAAACGTCGTCAAACTATGCTCGTTCGTTTGTGCTATGTTTGTGCTGGTTTGTG
26135	un placed scaffold0213	466829	41	TGCAGGTAGAAAAGTGCTGGATATCACTAAAACAAAAACAGTAAGCATCTTATTATTAAACAGTAAGACACATTTTATTTACTGAAAATGTACA
29009	LG24	22146662	60	AGTCCTGCTCAGTTTATATATATGAATCATGTCAGACGTGGTGTCTCTCTCCCCAGTTGGTGTTTGGAGTGTTAAAGTCCCATGTTCTCCTGCA
6153	LG24	22199821	60	CAAGCAAGGGTTGGTTCCCTGCAGCACAATATCTAGACAGCCGTTGTCATAACCCCTTATGTACCAGGCCCTCTATAAGCGGTTATAACCTGCA
